# Supplementary material for: Enhancer Evolution across 20 Mammalian Species
Source: PubMed Central journal article supplement (PMC4313353; doi:10.1016/j.cell.2015.01.006), 2015-01-29
Supplement: mmc1.pdf [file mmc1.pdf]

**Table S1. Species and Tissue Samples Used in This Study, Related to Figure 1 and Experimental Procedures**

| Species common name <sup>a</sup> | Species scientific name             | Age of sexual maturity / lifespan | Provider                      | Provider class  | Number of replicates | Sex        | Age                        | Age group        | Tissue preparation <sup>b</sup> |
|----------------------------------|-------------------------------------|-----------------------------------|-------------------------------|-----------------|----------------------|------------|----------------------------|------------------|---------------------------------|
| Human<br><b>Hsap</b>             | <i>Homo sapiens</i>                 | 12-15 years / 80 years            | Addenbrookes Hospital (UK)    | Hospital        | 4                    | All M      | unknown                    | adult            | fresh                           |
| Macaque<br><b>Mmul</b>           | <i>Macaca mulatta</i>               | 4 years / 20 years                | Medical Research Council (UK) | Research colony | 4                    | M, M, M, F | unknown, 18, 5, 11 (years) | adult, juvenile  | fresh                           |
| Vervet<br><b>Csab</b>            | <i>Chlorocebus aethiops sabaeus</i> | 2-5 years / 11-13 years           | Vervet Research Colony (US)   | Research colony | 3                    | All F      | 8, 9, 9 (years)            | adult            | fresh                           |
| Marmoset<br><b>Cjac</b>          | <i>Callithrix jacchus</i>           | 1.5 years / 12 years              | Harlan Ltd (UK)               | Research colony | 3                    | All M      | unknown                    | adult            | fresh                           |
| Mouse<br><b>Mmus</b>             | <i>Mus musculus domesticus</i>      | 6-8 weeks / 1-3 years             | Charles river (UK)            | Research colony | 4                    | All M      | 10 weeks                   | adult            | fresh                           |
| Rat<br><b>Rnor</b>               | <i>Rattus norvegicus</i>            | 5 weeks / 1-3 years               | Harlan Ltd (UK)               | Research colony | 3                    | All M      | 10 weeks                   | adult            | fresh                           |
| Guinea pig<br><b>Cpor</b>        | <i>Cavia porcellus</i>              | 3-5 weeks / 4-8 years             | Harlan Ltd (UK)               | Research colony | 3                    | All M      | 10 weeks                   | adult            | fresh                           |
| Naked mole rat<br><b>Hgla</b>    | <i>Heterocephalus glaber</i>        | 8-12 months / 30 years            | UIC (US)                      | Research colony | 3                    | All M      | 1 year                     | adult            | fresh                           |
| Rabbit<br><b>Ocun</b>            | <i>Oryctolagus cuniculus</i>        | 5-6 months / 8-12 years           | Harlan Ltd (UK)               | Research colony | 3                    | All M      | 7,12,12 (months)           | juvenile, adults | fresh                           |
| Tree shrew<br><b>Tbel</b>        | <i>Tupaia belangeri</i>             | 4-5 months / 9-12 years           | Cardiff University (UK)       | Research colony | 3                    | M, M, F    | 16, 3, 6 (months)          | adult, juveniles | fresh                           |
| Cow<br><b>Btau</b>               | <i>Bos taurus</i>                   | 8-12 months / 15 years            | B&K Ltd (UK)                  | Commercial      | 4                    | All M      | 2, 1.5, 2, 2 (years)       | adult            | fresh                           |

| Species common name <sup>a</sup>                                                     | Species scientific name           | Age of sexual maturity / lifespan | Provider                                                                          | Provider class                 | Number of replicates | Sex    | Age               | Age group        | Tissue preparation <sup>b</sup> |
|--------------------------------------------------------------------------------------|-----------------------------------|-----------------------------------|-----------------------------------------------------------------------------------|--------------------------------|----------------------|--------|-------------------|------------------|---------------------------------|
| Dolphin<br><b>Ddel</b><br><br>(short-beaked common dolphin and white-beaked dolphin) | <i>Delphinus delphis</i>          | 12-15 years / 22 years            | UK Cetacean Strandings Investigation Programme, Zoological Society of London (UK) | Specialised research programme | 1                    | M      | unknown           | adult            | frozen                          |
|                                                                                      | <i>Lagenorhynchus albirostris</i> | unknown / 25 years                |                                                                                   |                                | 1                    | F      | unknown           | adult            | frozen                          |
|                                                                                      | <i>Balaenoptera borealis</i>      | 8-10 years / 50-70 years          |                                                                                   |                                | 1                    | F      | unknown           | juvenile         | frozen                          |
| Sowerby's beaked whale<br><b>Mbid</b>                                                | <i>Mesoplodon bidens</i>          | 7 years / unknown                 |                                                                                   |                                | 2                    | Both F | unknown           | juvenile         | frozen                          |
| Pig<br><b>Sscr</b>                                                                   | <i>Sus scrofa</i>                 | 6 months / 10-15 years            | Harlan ltd (UK)                                                                   | Research colony                | 3                    | All M  | 2 years           | adult            | fresh                           |
| Dog<br><b>Cfam</b>                                                                   | <i>Canis familiaris</i>           | 1 year / 12-15 years              | Harlan ltd (UK)                                                                   | Research colony                | 3                    | All M  | 2.5, 1, 1 (years) | adult, juveniles | fresh                           |
| Cat<br><b>Fcat</b>                                                                   | <i>Felis catus</i>                | 5-10 months / 15 years            | Isoquimen ltd (Spain)                                                             | Research colony                | 2                    | Both F | 1.5 years         | adult            | fresh                           |
| Ferret<br><b>Mfur</b>                                                                | <i>Mustela putorius furo</i>      | 6 months / 8 years                | B&K ltd (UK)                                                                      | Research colony                | 3                    | All M  | 8, 6, 6 (months)  | adult, juveniles | fresh                           |
| Opossum<br><b>Mdom</b>                                                               | <i>Monodelphis domestica</i>      | 4-5 months / 4-8 years            | MRC National Institute for Medical Research (UK)                                  | Research colony                | 3                    | All M  | 6 months          | juveniles        | fresh                           |
| Tasmanian Devil<br><b>Shar</b>                                                       | <i>Sarcophilus harrisii</i>       | 2 years / 5-6 years               | Copenhagen Zoo (Denmark)                                                          | Zoo                            | 2                    | F, M   | 8, 7.5 (years)    | adult            | frozen                          |

<sup>a</sup> Species abbreviations used in the manuscript are given in bold

<sup>b</sup> see Extended Experimental Procedures (Chromatin immunoprecipitation and high through-put sequencing).

**Table S2. Quality Assessment of Reads Alignments and Peaks Detection, Related to Figure 1 and Experimental Procedures**

| Species         | Alignment genome and version <sup>a</sup> | Control reads <sup>b</sup> |                      | Peaks reproducibility (%) <sup>c</sup> |         | Replicate-specific peaks <sup>d</sup> |         |
|-----------------|-------------------------------------------|----------------------------|----------------------|----------------------------------------|---------|---------------------------------------|---------|
|                 |                                           | Aligned (%)                | Uniquely aligned (%) | H3K4me3                                | H3K27ac | H3K4me3                               | H3K27ac |
| Human           | GRCh37.p12/hg19                           | 95.1                       | 84.1                 | 94.7                                   | 77.0    | 660                                   | 11,533  |
| Macaque         | MMUL1.0/rheMac2                           | 96.8                       | 78.4                 | 87.6                                   | 73.9    | 1,535                                 | 10,183  |
| Vervet          | MMUL1.0/rheMac2                           | 84.5                       | 64.4                 | 65.5                                   | 73.4    | 6,093                                 | 9,341   |
| Marmoset        | C_jacchus3.2.1/calJac3                    | 96.8                       | 84.8                 | 80.5                                   | 78.5    | 3,549                                 | 11,258  |
| Mouse           | GRCm38.p2/mm10                            | 98.7                       | 73.3                 | 96.5                                   | 85.7    | 524                                   | 4,656   |
| Rat             | Rnor5.0/rn5                               | 96.9                       | 76.2                 | 79.4                                   | 80.5    | 4,552                                 | 8,350   |
| Guinea pig      | cavPor3                                   | 89.0                       | 68.0                 | 95.6                                   | 83.8    | 584                                   | 6,775   |
| Naked mole rat  | HetGla1.0/hetGla2                         | 98.2                       | 85.0                 | 93.2                                   | 84.6    | 969                                   | 6,301   |
| Rabbit          | OryCun2.0/oryCun2                         | 92.7                       | 63.7                 | 68.9                                   | 63.7    | 4,065                                 | 14,628  |
| Tree shrew      | tupBel1                                   | 77.8                       | 54.2                 | 89.0                                   | 82.9    | 1,904                                 | 6,445   |
| Cow             | UMD3.1/bosTau6                            | 98.4                       | 73.8                 | 94.2                                   | 74.0    | 786                                   | 13,645  |
| Dolphin         | turTru1                                   | 90.5                       | 67.0                 | 74.8                                   | 63.8    | 6,646                                 | 17,022  |
| Sei whale       | turTru1                                   | 61.4                       | 37.6                 | -                                      | -       | -                                     | -       |
| Beaked whale    | turTru1                                   | 62.0                       | 34.1                 | 62.4                                   | 69.8    | 8,769                                 | 12,377  |
| Pig             | Sscrofa10.2/susScr3                       | 88.3                       | 69.7                 | 87.7                                   | 77.0    | 1,515                                 | 9,380   |
| Dog             | CanFam3.1/canFam3                         | 97.5                       | 89.1                 | 93.9                                   | 83.6    | 716                                   | 5,608   |
| Cat             | Felis_catus_6.2/felCat5                   | 96.3                       | 89.2                 | 89.2                                   | 78.1    | 1,308                                 | 8,849   |
| Ferret          | MusPutFur1.0/musFur1                      | 91.6                       | 84.8                 | 80.4                                   | 77.2    | 3,973                                 | 9,420   |
| Opossum         | monDom5                                   | 96.2                       | 82.8                 | 88.1                                   | 79.0    | 2,208                                 | 9,717   |
| Tasmanian Devil | Devil_7.0/sarHar1                         | 96.2                       | 83.1                 | 84.6                                   | 67.5    | 2,523                                 | 14,674  |

<sup>a</sup> Ensembl genome versions were used, and the equivalent UCSC genome version is given after a slash. Both macaque and vervet ChIP-seq reads were aligned to the *Macaca mulatta* macaque genome, and all reads from all cetacean samples were aligned to the *Tursiops truncatus* dolphin genome.

<sup>b</sup> Average percentage of reads in the control experiments (total DNA) that can be either aligned or uniquely aligned to the reference genome.

<sup>c</sup> Average percentage of peaks per experiment that are replicated in at least one other experiment (see Experimental Procedures, Short reads alignment and peak calling).

<sup>d</sup> Average number of peaks specific to an individual, i.e. not replicated in any other experiment.

**Table S3: Association Tests between Liver-Specific Genes and Highly-Conserved or Recently-Evolved Human Promoters and Enhancers, Related to Figures 5 and 6**

| Genomic elements set             | Wilcoxon test               |           |               | Hypergeometric test                                      |                |                    |                                  |               | Hypergeometric test                                      |                    |                 |              |               |
|----------------------------------|-----------------------------|-----------|---------------|----------------------------------------------------------|----------------|--------------------|----------------------------------|---------------|----------------------------------------------------------|--------------------|-----------------|--------------|---------------|
|                                  | Liver-specific <sup>a</sup> | All genes | p-value       | Promoters/enhancers associated with liver-specific genes |                |                    |                                  |               | Liver-specific genes associated with promoters/enhancers |                    |                 |              |               |
|                                  |                             |           |               | Elements in liver-sp genes                               | Total elements | All other elements | Total elements in liver-sp genes | p-value       | Liver-sp genes within                                    | All liver-sp genes | All other genes | Genes within | p-value       |
| Highly-conserved promoters       | 0.011                       | 0.044     | 0.7965        | 53                                                       | 1871           | 9732               | 313                              | 0.3140        | 47                                                       | 228                | 9,153           | 1,908        | 0.4196        |
| Highly-conserved enhancers       | 0.027                       | 0.009     | <b>0.0097</b> | 16                                                       | 279            | 28,813             | 968                              | <b>0.0127</b> | 16                                                       | 215                | 7,084           | 294          | <b>0.0059</b> |
| Recently-evolved human promoters | 0.059                       | 0.037     | <b>0.0325</b> | 34                                                       | 783            | 11,013             | 316                              | <b>0.0019</b> | 33                                                       | 228                | 9,153           | 778          | <b>0.0005</b> |
| Recently-evolved human enhancers | 0.414                       | 0.505     | 0.6956        | 274                                                      | 10,363         | 18,729             | 968                              | 0.9999        | 124                                                      | 215                | 7,084           | 4,839        | 0.9954        |

5

<sup>a</sup> Liver-specific genes were identified as described in Methods, using publicly available expression data from 16 human tissues (Petryszak et al., 2014).

**Table S4. Number of Lineage-Specific and Recently-Evolved Elements Identified in Primates, Rodents, Ungulates and Carnivores, Related to Figure 6**

| <b>STRICT ASSESSMENT OF ACTIVITY CONSERVATION (REPRODUCIBLE ORTHOLOGOUS PEAKS)<sup>a</sup></b>          |                      |                        |                  |                  |                  |                        |                  |                  |                  |
|---------------------------------------------------------------------------------------------------------|----------------------|------------------------|------------------|------------------|------------------|------------------------|------------------|------------------|------------------|
|                                                                                                         | Species <sup>b</sup> | Promoters <sup>c</sup> | Highly-conserved | Lineage-specific | Recently-evolved | Enhancers <sup>c</sup> | Highly-conserved | Lineage-specific | Recently-evolved |
| <b>PRIMATES</b>                                                                                         | <b>Human</b>         | 11,613                 |                  |                  | 794              | 29,177                 |                  |                  | 10,434           |
|                                                                                                         | <b>Macaque</b>       | 10,729                 |                  | 13               |                  | 22,911                 |                  | 352              |                  |
|                                                                                                         | Vervet               | 9,704                  |                  |                  |                  | 16,769                 |                  |                  |                  |
|                                                                                                         | <b>Marmoset</b>      | 10,808                 |                  |                  |                  | 31,649                 |                  |                  |                  |
| <b>RODENTS</b>                                                                                          | <b>Mouse</b>         | 12,443                 |                  |                  | 2,847            | 18,561                 |                  |                  | 7,930            |
|                                                                                                         | <b>Rat</b>           | 13,782                 |                  |                  |                  | 22,471                 |                  |                  |                  |
|                                                                                                         | Guinea pig           | 11,986                 |                  | 121              |                  | 25,153                 |                  | 136              |                  |
|                                                                                                         | Naked mole rat       | 11,300                 |                  |                  |                  | 25,238                 |                  |                  |                  |
|                                                                                                         | <b>Rabbit</b>        | 8,790                  | 1,872            |                  |                  | 19,115                 | 279              |                  |                  |
|                                                                                                         | Tree shrew           | 13,426                 |                  |                  |                  | 19,642                 |                  |                  |                  |
| <b>UNGULATES</b>                                                                                        | <b>Cow</b>           | 12,972                 |                  |                  | 2,108            | 32,371                 |                  |                  | 13,929           |
|                                                                                                         | Dolphin              | 15,019                 |                  |                  |                  | 14,770                 |                  |                  |                  |
|                                                                                                         | Sei whale            | 17,045                 |                  | 275              |                  | 34,381                 |                  | 928              |                  |
|                                                                                                         | Beaked whale         | 11,653                 |                  |                  |                  | 16,432                 |                  |                  |                  |
|                                                                                                         | <b>Pig</b>           | 10,103                 |                  |                  |                  | 23,822                 |                  |                  |                  |
| <b>CARNIVORES</b>                                                                                       | <b>Dog</b>           | 10,329                 |                  |                  | 1,793            | 20,220                 |                  |                  | 9,012            |
|                                                                                                         | <b>Cat</b>           | 9,355                  |                  | 165              |                  | 22,238                 |                  | 734              |                  |
|                                                                                                         | Ferret               | 13,140                 |                  |                  |                  | 21,377                 |                  |                  |                  |
| <b>MARSUPIALS</b>                                                                                       | Opossum              | 15,211                 |                  |                  |                  | 23,271                 |                  |                  |                  |
|                                                                                                         | Tasmanian devil      | 10,496                 |                  |                  |                  | 19,983                 |                  |                  |                  |
| <b>LENIENT ASSESSMENT OF ACTIVITY CONSERVATION (ANY SIGNAL AT ANY ORTHOLOGOUS LOCATION)<sup>a</sup></b> |                      |                        |                  |                  |                  |                        |                  |                  |                  |
|                                                                                                         | Species <sup>b</sup> | Promoters <sup>c</sup> | Highly-conserved | Lineage-specific | Recently-evolved | Enhancers <sup>c</sup> | Highly-conserved | Lineage-specific | Recently-evolved |
| <b>PRIMATES</b>                                                                                         | <b>Human</b>         | 11,613                 |                  |                  | 737              | 29,177                 |                  |                  | 8,699            |
|                                                                                                         | <b>Macaque</b>       | 10,729                 |                  | 10               |                  | 22,911                 |                  | 356              |                  |
|                                                                                                         | Vervet               | 9,704                  |                  |                  |                  | 16,769                 |                  |                  |                  |
|                                                                                                         | <b>Marmoset</b>      | 10,808                 |                  |                  |                  | 31,649                 |                  |                  |                  |
| <b>RODENTS</b>                                                                                          | <b>Mouse</b>         | 12,443                 |                  |                  | 2,602            | 18,561                 |                  |                  | 6,891            |
|                                                                                                         | <b>Rat</b>           | 13,782                 |                  |                  |                  | 22,471                 |                  |                  |                  |
|                                                                                                         | Guinea pig           | 11,986                 |                  | 131              |                  | 25,153                 |                  | 202              |                  |
|                                                                                                         | Naked mole rat       | 11,300                 |                  |                  |                  | 25,238                 |                  |                  |                  |
|                                                                                                         | <b>Rabbit</b>        | 8,790                  | 2,457            |                  |                  | 19,115                 | 684              |                  |                  |
|                                                                                                         | Tree shrew           | 13,426                 |                  |                  |                  | 19,642                 |                  |                  |                  |
| <b>UNGULATES</b>                                                                                        | <b>Cow</b>           | 12,972                 |                  |                  | 1,941            | 32,371                 |                  |                  | 12,111           |
|                                                                                                         | Dolphin              | 15,019                 |                  |                  |                  | 14,770                 |                  |                  |                  |
|                                                                                                         | Sei whale            | 17,045                 |                  | 147              |                  | 34,381                 |                  | 1021             |                  |
|                                                                                                         | Beaked whale         | 11,653                 |                  |                  |                  | 16,432                 |                  |                  |                  |
|                                                                                                         | <b>Pig</b>           | 10,103                 |                  |                  |                  | 23,822                 |                  |                  |                  |
| <b>CARNIVORES</b>                                                                                       | <b>Dog</b>           | 10,329                 |                  |                  | 1,695            | 20,220                 |                  |                  | 7,818            |
|                                                                                                         | <b>Cat</b>           | 9,355                  |                  | 37               |                  | 22,238                 |                  | 736              |                  |
|                                                                                                         | Ferret               | 13,140                 |                  |                  |                  | 21,377                 |                  |                  |                  |
| <b>MARSUPIALS</b>                                                                                       | Opossum              | 15,211                 |                  |                  |                  | 23,271                 |                  |                  |                  |
|                                                                                                         | Tasmanian devil      | 10,496                 |                  |                  |                  | 19,983                 |                  |                  |                  |

5 <sup>a</sup> **Strict assessment:** an active region in species A is defined as conserved in species B if the orthologous locus in species B was reproducibly active in two replicates or more. **Lenient assessment:** an active region in species A is defined as conserved in species B if any replicate in species B showed significant activity at the orthologous locus ( $p < 10^{-5}$ , no FDR correction).

10 <sup>b</sup> Reference species in each lineage are indicated in bold. Additional species in the EPO multiple alignment, used to identify highly-conserved elements, are indicated in blue.

15 <sup>c</sup> Numbers given are total promoters or enhancers experimentally identified from each species' ChIP-seq data.

**Table S5. Association Tests between Positively Selected Genes (PSGs) and Recently-Evolved Enhancers in Naked Mole Rat and Dolphin, Related to Figure 7**

|                          |                            | Wilcoxon test                                     |           |              | Hypergeometric test                             |                  |                     |                         |              | Hypergeometric test                             |      |                 |                             |              |
|--------------------------|----------------------------|---------------------------------------------------|-----------|--------------|-------------------------------------------------|------------------|---------------------|-------------------------|--------------|-------------------------------------------------|------|-----------------|-----------------------------|--------------|
|                          |                            | Mean proportion of recently-evolved enhancers in: |           |              | Recently-evolved enhancers associated with PSGs |                  |                     |                         |              | PSGs associated with recently-evolved enhancers |      |                 |                             |              |
| PSG set                  | Recently-evolved enhancers | PSGs                                              | All genes | p-value      | Rec-ev in PSGs                                  | Rec-ev enhancers | All other enhancers | Total enhancers in PSGs | p-value      | PSGs with rec-ev enhancers                      | PSGs | All other genes | Genes with rec-ev enhancers | p-value      |
| Dolphin_Sun <sup>a</sup> | Dolphin                    | 0.0643                                            | 0.0360    | <b>0.059</b> | 9                                               | 614              | 1580                | 24                      | 0.104        | 8                                               | 101  | 21225           | 878                         | <b>0.023</b> |
| Whale_Yim <sup>b</sup>   | Dolphin                    | 0.0386                                            | 0.0360    | 0.651        | 13                                              | 614              | 1580                | 39                      | 0.175        | 11                                              | 233  | 21093           | 878                         | 0.254        |
| NMR_Kim <sup>c</sup>     | Naked mole rat             | 0.0872                                            | 0.0590    | <b>0.045</b> | 35                                              | 2827             | 22241               | 236                     | <b>0.037</b> | 24                                              | 110  | 25717           | 3902                        | <b>0.022</b> |

<sup>a</sup> Genes under positive selection in dolphin, as identified in (Sun et al., 2013).

<sup>b</sup> Genes under positive selection in whale (Yim et al., 2014) were used as a negative control.

5 <sup>c</sup> Positively selected genes in naked mole rat, originally identified in (Kim et al., 2011).
